# Supplementary material for: Physicochemical compatibility of highly-concentrated solvate ionic liquids and a low-viscosity solvent
Source: RSC Adv. 2019 Aug 12;9(43):24922–7. doi: 10.1039/c9ra04797b (PMC9069941; doi:10.1039/c9ra04797b)
Supplement: RA-009-C9RA04797B-s001 [file RA-009-C9RA04797B-s001.pdf]

Supporting Information

## **Physicochemical Compatibility of High-Concentrated Solvate Ionic Liquids and Low-viscosity Dilute Solvent**

Keitaro Takahashi,<sup>a</sup> Yuki Ishino,<sup>a</sup> Wataru Murata,<sup>a</sup> Yasuhiro Umebayashi,<sup>b</sup> Seiji Tsuzuki,<sup>c</sup> Masayoshi Watanabe,<sup>d</sup> Hiromitsu Takaba<sup>a</sup> and Shiro Seki<sup>a\*</sup>

<sup>a</sup> Graduate School of Applied Chemistry and Chemical Engineering, Kogakuin University, 2665-1 Nakano-machi, Hachioji, Tokyo 192-0015, Japan

<sup>b</sup> Graduate School of Science and Technology, Niigata University, 8050 Ikarashi, 2-no-cho, Nishi-ku, Niigata 950-218, Japan

<sup>c</sup> National Institute of Advanced Industrial Science and Technology (AIST), 1-1-1 Umezono, Tsukuba, Ibaraki 305-8568, Japan

<sup>d</sup> Department of Chemistry and Biotechnology, Yokohama National University, 79-5 Tokiwadai, Hodogaya-ku, Yokohama, Kanagawa 240-8501, Japan

\* Corresponding author: shiro-seki@cc.kogakuin.ac.jp

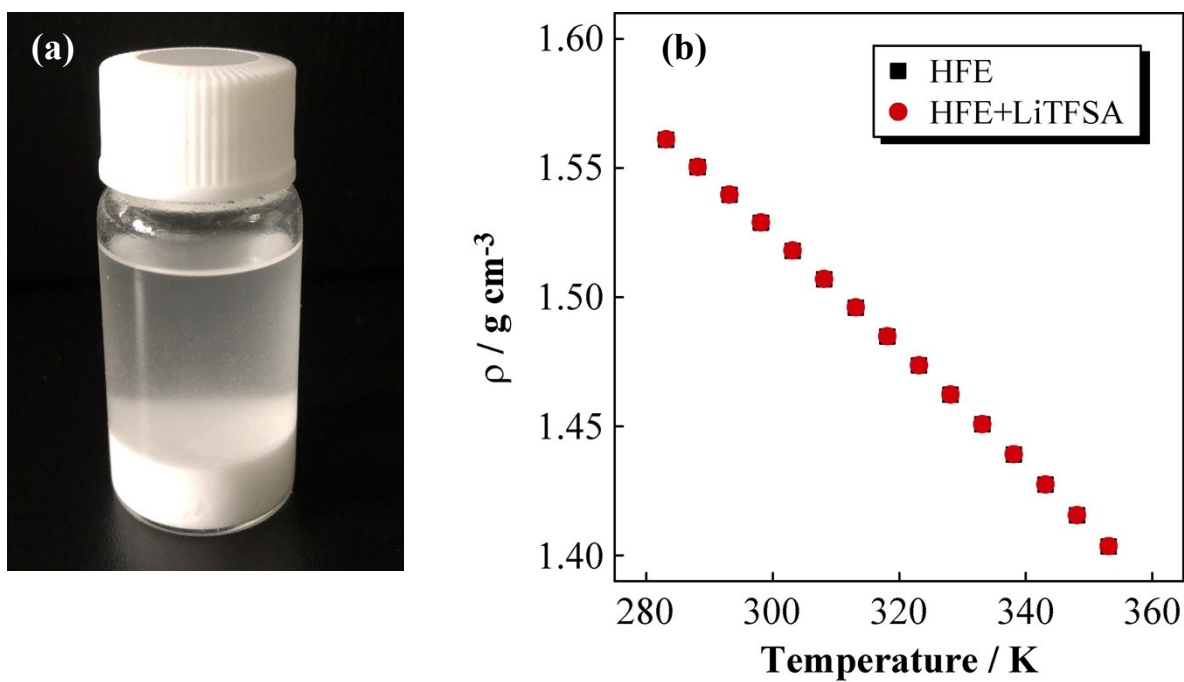

**Figure S1** Appearance of LiTFSA and HFE mixture (a) and densities of their supernatant liquid (b).
